# Supplementary material
Source: Springer Nature journal article supplement (https://www.springermedizin.de/resource/supplementary/12967_2006_155_MOESM2_ESM.pdf/9575828)

Shorter Survival | Longer Survival

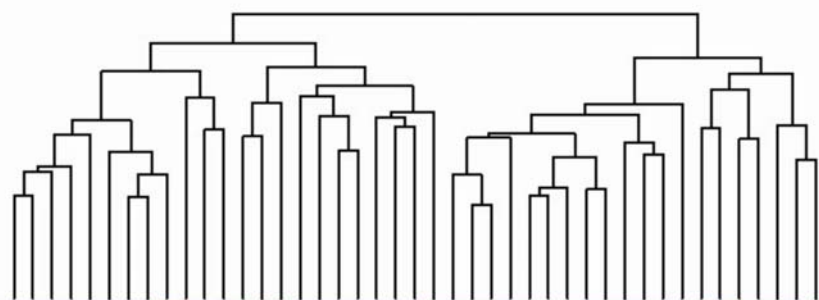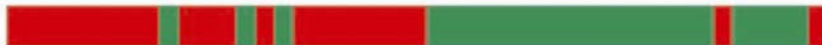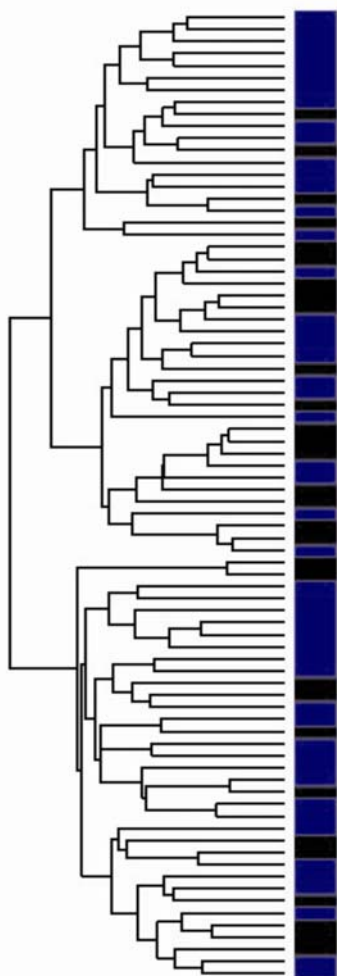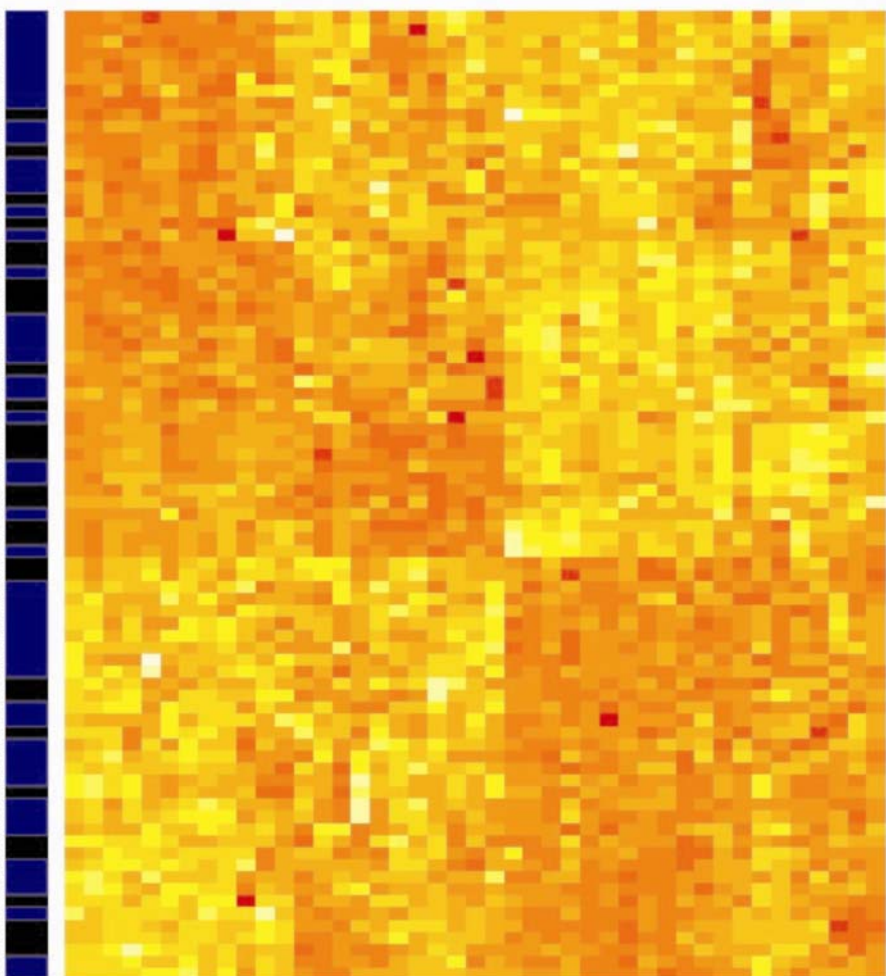

Genes

0.54  
0.85  
0.70  
0.61  
0.34  
1.84  
1.05  
0.65  
2.95  
2.41  
0.58  
0.69  
0.28  
1.42  
0.10  
1.02  
1.29  
0.47  
0.05  
0.30  
1.07  
1.02  
2.51  
2.38  
4.10  
6.21  
5.81  
1.63  
2.20  
2.97  
1.66  
5.45  
1.67  
2.22  
1.06  
4.88  
2.23  
1.51

Martingale residuals

Supplement: MOESM2 [file 9575828]
